# Supplementary material
Source: PubMed Central journal article supplement (PMC5328481)
Supplement: IAI.00731-16_zii999091982s1.pdf [file IAI.00731-16_zii999091982s1.pdf]

Sup. Fig. 1

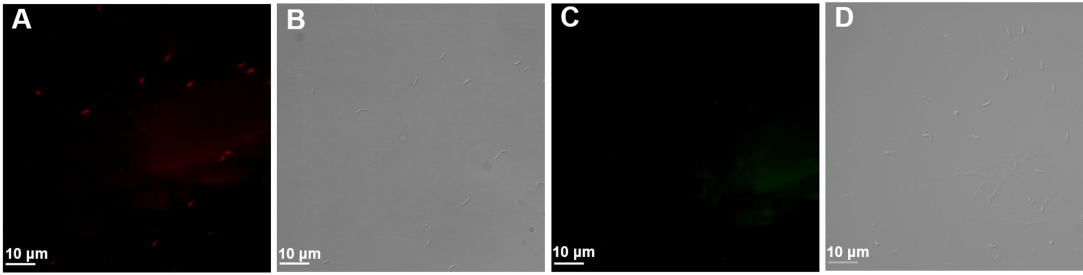

**Figure S1:** Filtered sporozoite inoculum contains no intact oocysts or shells. Filtered sporozoites were spotted on slides, fixed, permeabilized and stained with (A) Sporoglo or (B) Cryptoglo. (B) and (D) are DIC images of the same fields as (A) and (B).
